# Supplementary material for: Regulation of sensitivity of tumor cells to antitubulin drugs by Cdk1-TAZ signalling
Source: PubMed Central journal article supplement (PMC4673135; doi:10.18632/oncotarget.4259), 2015-06-08
Supplement: oncotarget-06-21906-s001.pdf [file oncotarget-06-21906-s001.pdf]

SUPPLEMENTARY FIGURES

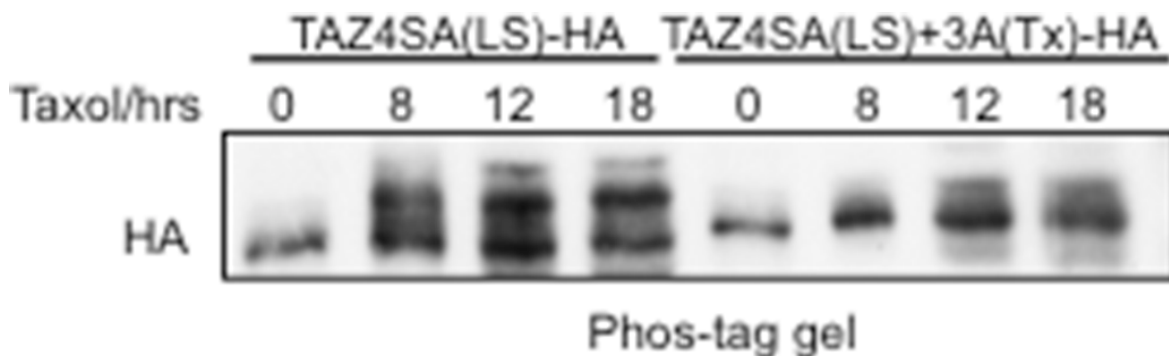

**Supplementary Figure 1: Phosphorylations of TAZ by Cdk1 is time dependent.** TAZ4SA(LS) and TAZ4SA(LS)+3(Tx) were treated with Taxol (100 nM) for 0, 8, 12, 18 hours. Floating cells were collected and lysed for phos-tag detecting phosphorylation of the constructs.

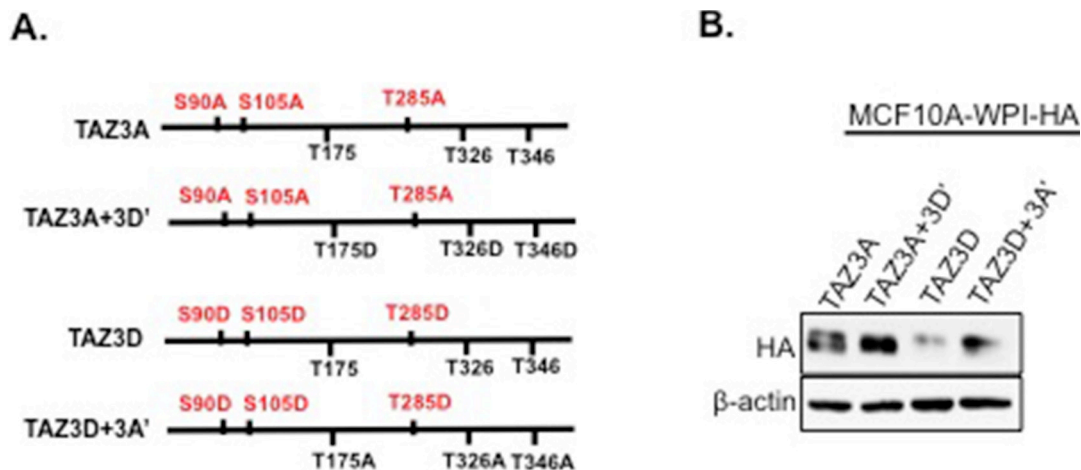

**Supplementary Figure 2: The rest three Cdk1 phosphorylation sites on TAZ play a role in TAZ degradation.** A. The difference between TAZ3A+3D', TAZ3D+3A', TAZ3A and TAZ3D. B. Protein expressions of MCF10A stably overexpressing the mutants.
